# Supplementary material for: A green strategy toward the preparation of poly(vinyl chloride) nanocomposites reinforced with MnO2@layered double hydroxide nanohybrids as efficient UV shielding materials
Source: Royal Society of Chemistry journal article supplement (doi:10.1039/d0nj02135k), 2020-01-01
Supplement: d0nj02135k1.pdf [file d0nj02135k1.pdf]

## Supporting Information for NJC:

### A green strategy toward preparation of poly(vinyl chloride) nanocomposites reinforced with MnO<sub>2</sub>@layered double hydroxide nanohybrid as efficient UV shielding materials

Shadpour Mallakpour \*, Mina Naghdi

*Organic Polymer Chemistry Research Laboratory, Department of Chemistry, Isfahan University of Technology, Isfahan, 84156-83111, Islamic Republic of Iran*

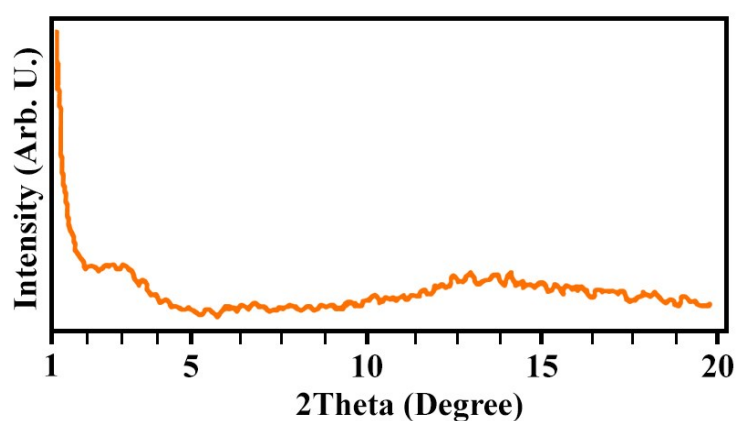

**Fig. S1** Low angle XRD of M-MnO<sub>2</sub>@D-LDH (M-MnO<sub>2</sub> nanorods: Methionine modified MnO<sub>2</sub> nanorods, D-LDH: Diacid modified layered double hydroxide).

---

\* Corresponding author at. Organic Polymer Chemistry Research Laboratory, Department of Chemistry, Isfahan University of Technology, Isfahan, 84156-83111, I. R. Iran.

*E-mail address:* [mallak@iut.ac.ir](mailto:mallak@iut.ac.ir), [mallak777@yahoo.com](mailto:mallak777@yahoo.com) (S. Mallakpour).

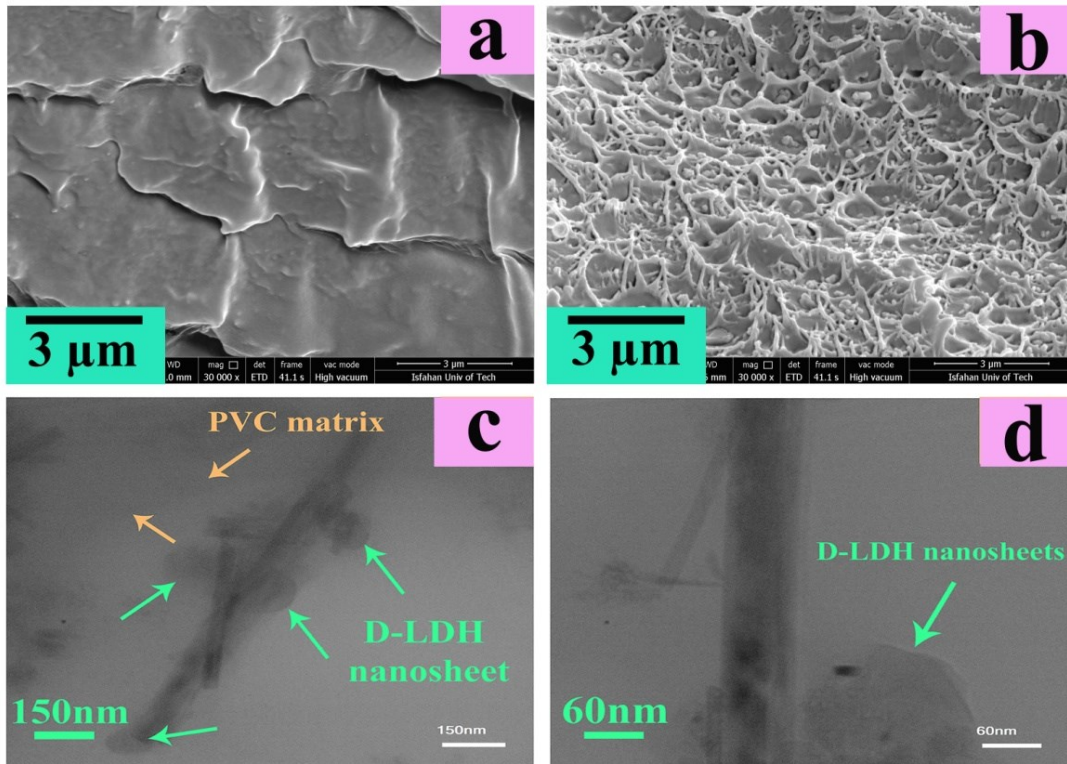

**Fig. S2** Cross-sectional FESEM images of (a) PVC and (b) PVC/M-MnO<sub>2</sub>@D-LDH nanocomposite-10. (c and d) TEM images of PVC/M-MnO<sub>2</sub>@D-LDH nanocomposite-15 [PVC: Poly(vinyl chloride), M-MnO<sub>2</sub> nanorods: Methionine modified MnO<sub>2</sub> nanorods, D-LDH: Diacid modified layered double hydroxide].

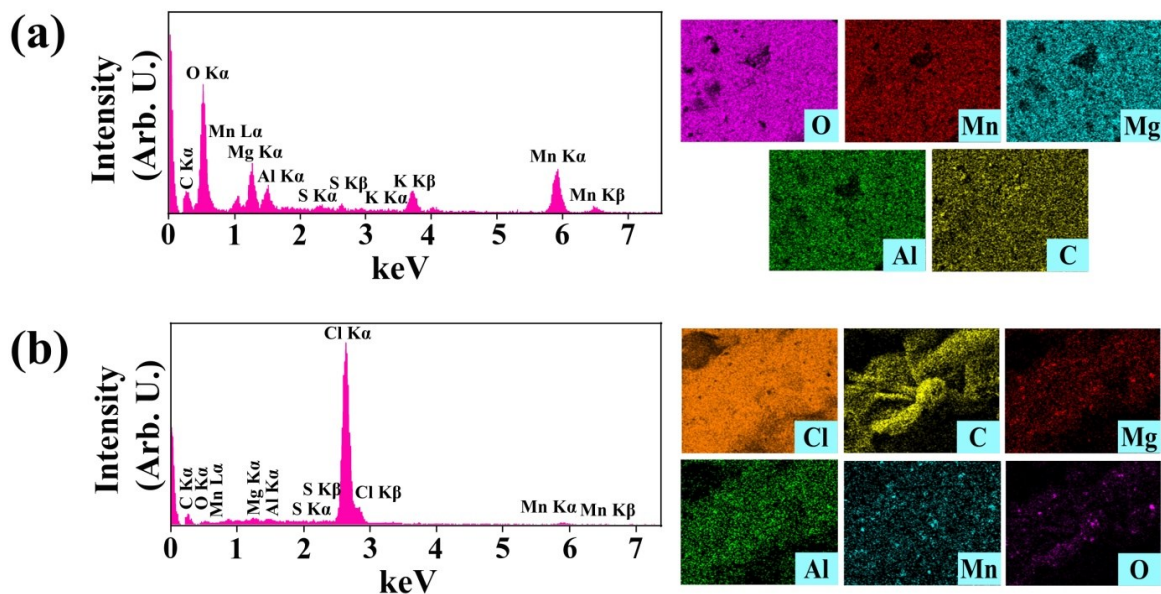

**Fig. S3** EDX spectrum and elemental mapping of (a) M-MnO<sub>2</sub>@D-LDH nanohybrid and (b) PVC/M-MnO<sub>2</sub>@D-LDH nanocomposite-15 [PVC: Poly(vinyl chloride), M-MnO<sub>2</sub> nanorods: Methionine modified MnO<sub>2</sub> nanorods, D-LDH: Diacid modified layered double hydroxide].

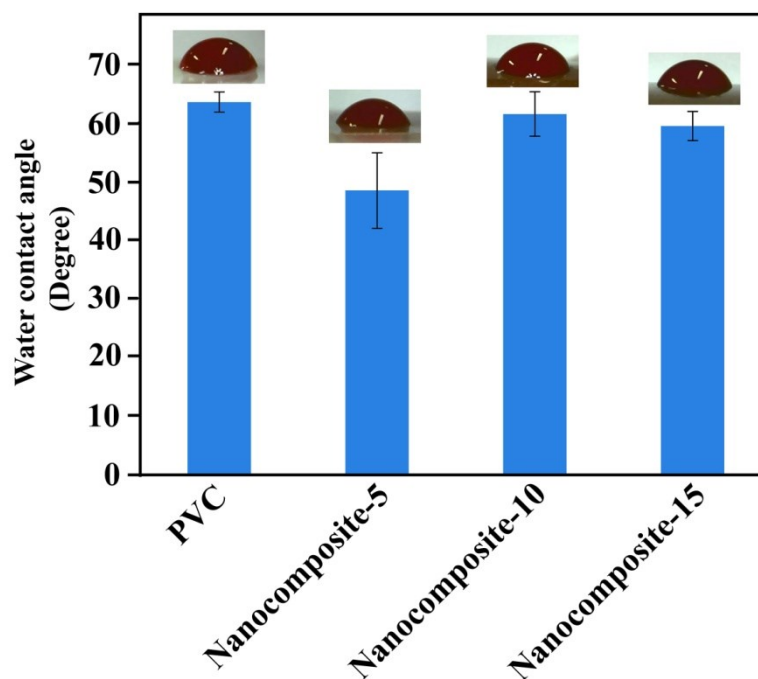

**Fig. S4** Water contact angles of pure PVC and prepared PVC/M-MnO<sub>2</sub>@D-LDH nanocomposites [PVC: Poly(vinyl chloride), M-MnO<sub>2</sub> nanorods: Methionine modified MnO<sub>2</sub> nanorods, D-LDH: Diacid modified layered double hydroxide].
